# Supplementary material for: Photoluminescence of oxygen vacancies and hydroxyl group surface functionalized SnO2 nanoparticles
Source: Royal Society of Chemistry journal article supplement (doi:10.1039/c5cp00060b), 2015-01-01
Supplement: c5cp00060b1.pdf [file c5cp00060b1.pdf]

## Supplementary

# Photoluminescence of oxygen vacancies and surface functional hydroxyl groups of SnO<sub>2</sub> nanoparticles

Venkataramana Bonu,<sup>\*1</sup> Arindam Das,<sup>\*1</sup> S. Amirthapandian,<sup>2</sup> Sandip Dhara,<sup>1</sup> and Ashok Kumar Tyagi<sup>1</sup>

<sup>1</sup>Surface and Nanoscience Division, <sup>2</sup>Materials Physics Division, Indira Gandhi Center for Atomic Research, Kalpakkam-603102, India. E-mail: [dasa@igcar.gov.in](mailto:dasa@igcar.gov.in), [ramana9hcu@gmail.com](mailto:ramana9hcu@gmail.com)

**TABLE SI.** Size and Band gap of the SnO<sub>2</sub> NPs with respect to annealing temperature.

| Sample (Annealing Temperature) | Calculated size Using LFRS (nm) | Measured size using TEM (nm) | Band gap (eV) |
|--------------------------------|---------------------------------|------------------------------|---------------|
| A (100 °C)                     | 2.41±0.15                       | 2.4±0.1                      | 4.4 ± 0.05    |
| B (200 °C)                     | 2.66±0.18                       | -                            | 4.25 ± 0.05   |
| C (250 °C)                     | 3.1±0.22                        | -                            | 4.06 ± 0.05   |
| D (300 °C)                     | 3.7±0.27                        | 4.1±0.2                      | 3.9 ± 0.05    |
| E (500 °C)                     | -                               | 9.5±0.7                      | 3.67 ± 0.05   |
| F (800 °C)                     | -                               | 25±1                         | 3.62          |

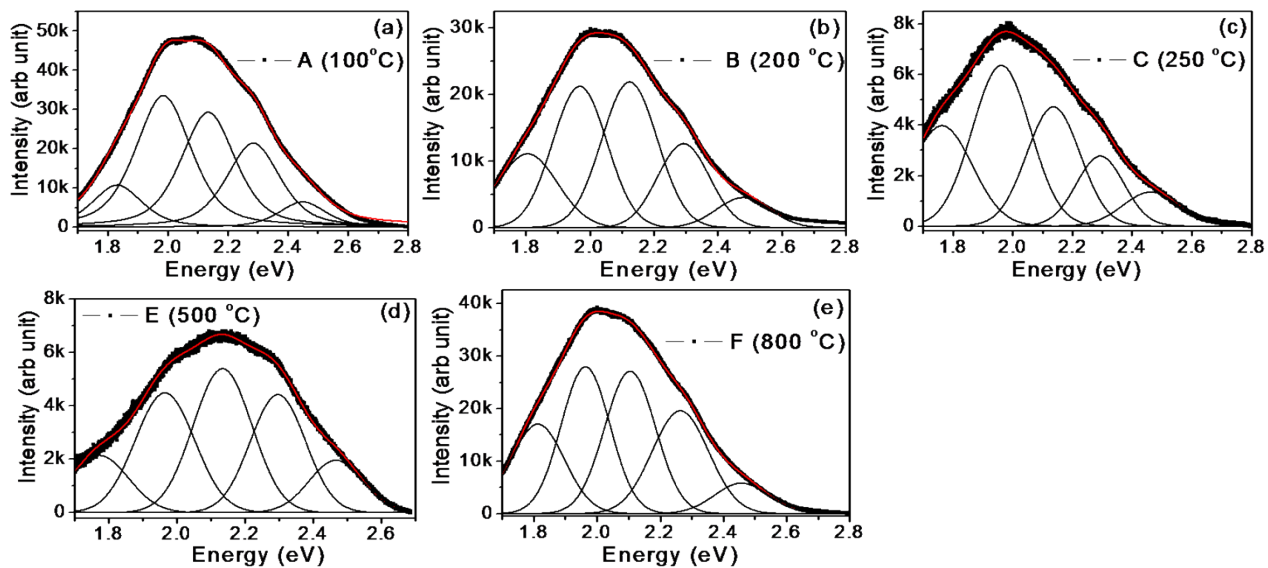

Fig. S1. Gaussian deconvolution of the PL spectra shown in Fig. 6. Area under each curve is deduced and shown in TABLE 2.

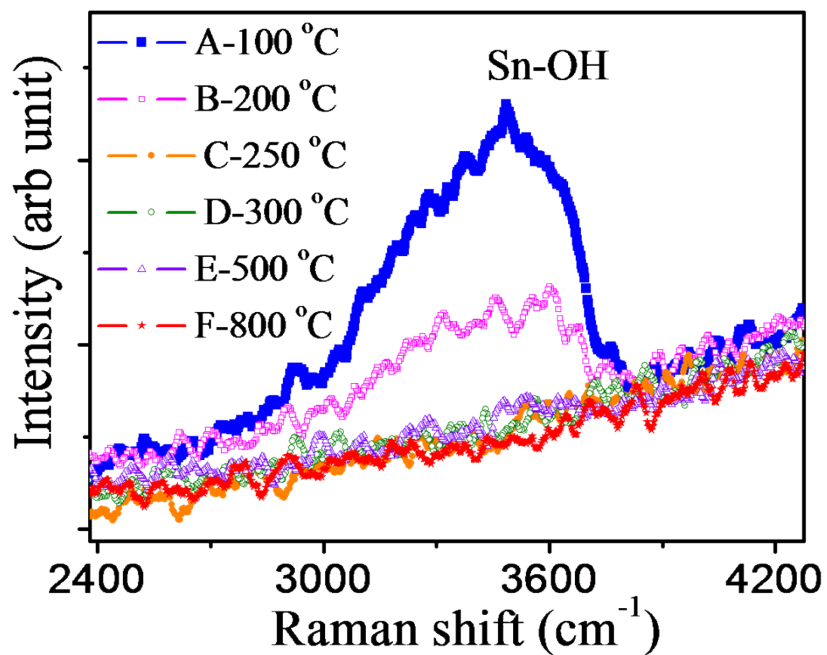

Fig. S2. Hydroxyl Raman mode of different size  $\text{SnO}_2$  NPs with excitation 325 nm.
